# Supplementary material for: Colorimetric sensing method for polyamines utilising an inclusion complex of stimuli-responsive amylose
Source: Royal Society of Chemistry journal article supplement (doi:10.1039/c0ay00690d), 2011-01-01
Supplement: c0ay00690d.pdf [file c0ay00690d.pdf]

## Electronic Supplementary Information

### Colorimetric Sensing Method for Polyamines utilising Inclusion Complex of Stimuli-responsive Amylose

Masayuki Tsuchiya, Yuta Nomiya, Wakana Takayoshi, Yuto Iwami, and Yasumasa Kanekiyo\*

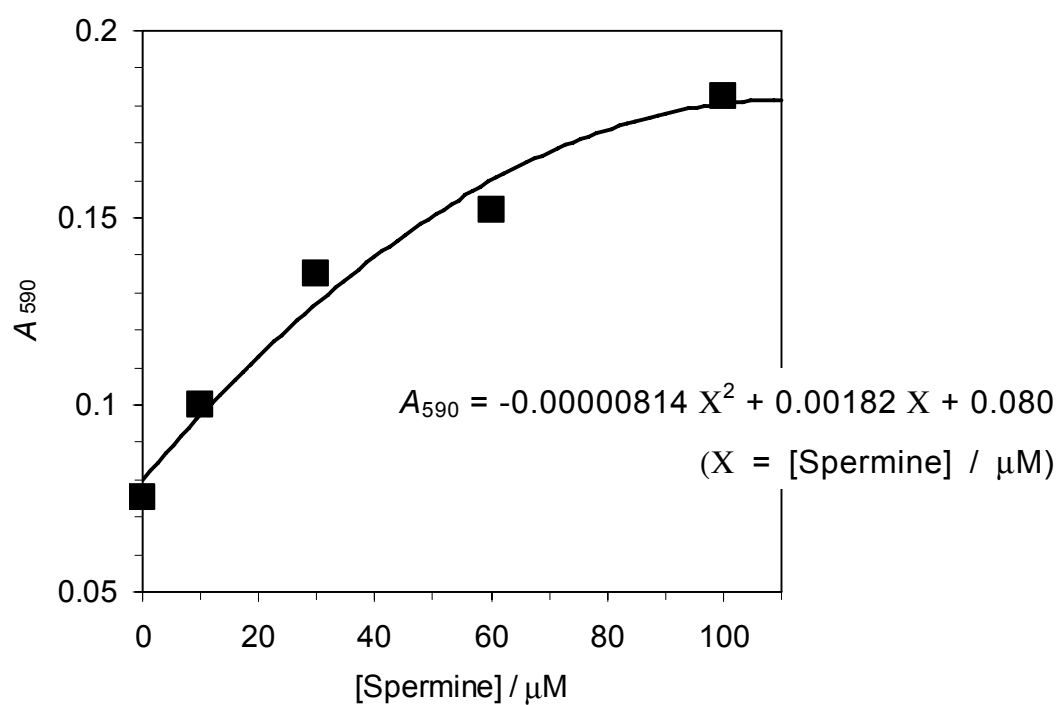

**Fig. S1** Dependence of absorption at 590 nm on spermine concentration. Measurement conditions: [Succinylamylose (DS = 0.22)] =  $45 \text{ mg L}^{-1}$ ,  $[\text{I}_2]$  =  $6 \text{ mg L}^{-1}$ ,  $[\text{KI}]$  =  $60 \text{ mg L}^{-1}$ , pH = 7.0 (10 mM phosphate), Temp. =  $20^\circ\text{C}$ .

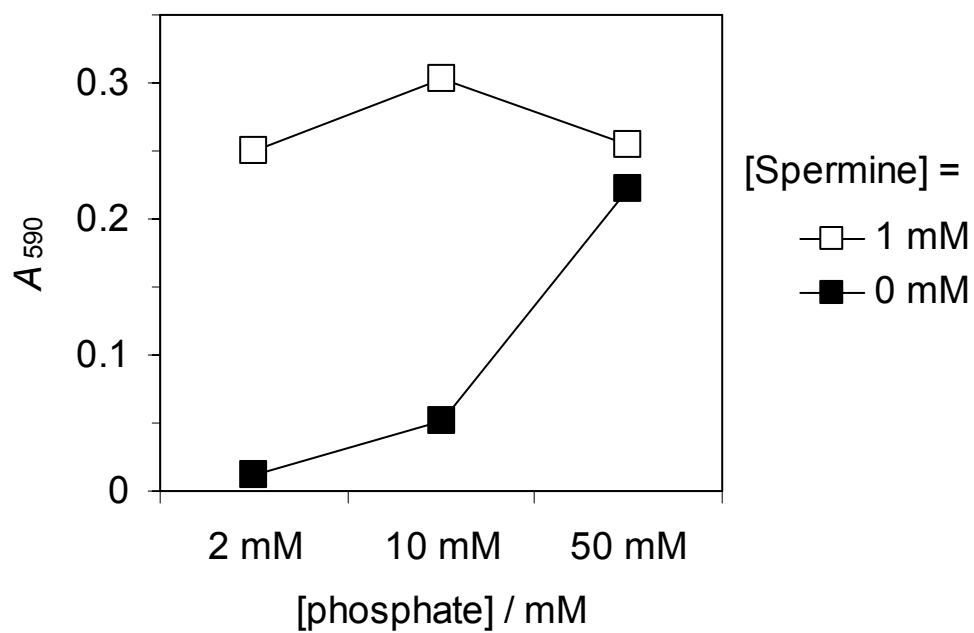

**Fig. S2** Effect of phosphate concentration on absorbance at 590 nm. Dependence of absorption at 590 nm on spermine concentration. Measurement conditions: [Succinylamylose (DS = 0.25)] = 45 mg L<sup>-1</sup>, [I<sub>2</sub>] = 6 mg L<sup>-1</sup>, [KI] = 60 mg L<sup>-1</sup>, pH = 7.0, Temp. = 20°C.
